## Gene expression

# MACA: marker-based automatic cell-type annotation for single-cell expression data

Yang Xu <sup>\*,†</sup>, Simon J. Baumgart<sup>‡</sup>, Christian M. Stegmann<sup>§</sup> and Sikander Hayat <sup>\*,¶</sup>

Bayer-Broad Joint Precision Cardiology Lab, 75 Ames Street, Cambridge, MA 02142, USA

\*To whom correspondence should be addressed.

<sup>†</sup>Present address: UT-ORNL Graduate School of Genome Science and Technology, The University of Tennessee, Knoxville, TN, USA

<sup>‡</sup>Present address: Novo Nordisk, Data Mining and Bioinformatics, Copenhagen, Denmark

<sup>§</sup>Present address: Pre-clinical Research, Vifor Pharma Group, Switzerland

<sup>¶</sup>Present address: Institute of Experimental Medicine and Systems Biology, RWTH Aachen University, Aachen, Germany

Associate Editor: Olga Vitek

Received on March 22, 2021; revised on October 7, 2021; editorial decision on November 7, 2021

## Abstract

**Summary:** Accurately identifying cell types is a critical step in single-cell sequencing analyses. Here, we present marker-based automatic cell-type annotation (MACA), a new tool for annotating single-cell transcriptomics datasets. We developed MACA by testing four cell-type scoring methods with two public cell-marker databases as reference in six single-cell studies. MACA compares favorably to four existing marker-based cell-type annotation methods in terms of accuracy and speed. We show that MACA can annotate a large single-nuclei RNA-seq study in minutes on human hearts with ~290K cells. MACA scales easily to large datasets and can broadly help experts to annotate cell types in single-cell transcriptomics datasets, and we envision MACA provides a new opportunity for integration and standardization of cell-type annotation across multiple datasets.

**Availability and implementation:** MACA is written in python and released under GNU General Public License v3.0. The source code is available at <https://github.com/lmXman/MACA>.

**Contact:** yxu71@vols.utk.edu or shayat@ukaachen.de

**Supplementary information:** [Supplementary data](#) are available at *Bioinformatics* online.

## 1 Introduction

Identifying constituent cell types in a single-cell dataset is fundamental to understand the underlying biology of the system. Many computational methods have been proposed to automatically label cells, and a benchmark study shows that a standard Support Vector Machine (SVM) classifier outperforms most other sophisticated supervised methods and can achieve high accuracy in cell-type assignment (Abdelaal *et al.*, 2019). However, due to lack of ground truth in most single-cell studies, supervised classification approaches are not feasible and may not be generalized for new single-cell studies with different experimental designs. Therefore, unsupervised clustering approaches are still the predominant options for single-cell data analysis (Lähnemann *et al.*, 2020). Unsupervised approaches usually require human assistance in both defining clustering resolution and manual annotation of cell types. This results in cell-type annotation being time-consuming and less reproducible due to human inference. As more single-cell studies are available, summarizing markers identified in these studies to construct a marker database becomes an alternative approach for automatic cell-type

annotation. For example, PanglaoDB (Franzén *et al.*, 2019) and CellMarker (Zhang *et al.*, 2019b) are two marker databases that summarize markers found in numerous single-cell studies and cover a broad range of major cell types in human and mouse. Also, NeuroExpresso (Mancarci *et al.*, 2017) is a specialized database for brain cell types. Taking advantage of those databases for robust cell-type identification, we present a marker-based automatic cell-type annotation (MACA) method and show how MACA automatically annotates cell types with high speed and accuracy. We envision MACA as an aid for cell-type annotation to be used by both experts and non-experts.

## 2 MACA implementation

MACA takes as input expression profiles measured by single-cell or nuclei RNA-seq experiments. MACA calculates two cell-type labels for each cell based on (i) an individual cell expression profile and (ii) a collective clustering profile. From these, a final cell-type label is generated according to a normalized confusion matrix (Fig. 1a).

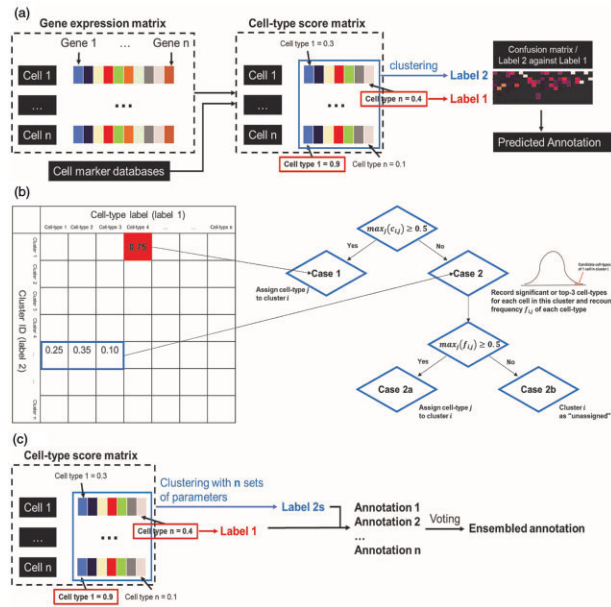

**Fig. 1.** Schematic workflow of MACA. (a) MACA converts gene-expression matrix into cell-type score matrix based on cell-marker database. MACA generates Label 1 by using max function and Label 2 by over-clustering all cells into small groups. MACA finally maps Label 2 to Label 1 via confusion matrix. (b) Use of confusion matrix for cell-type annotation. (c) In practical implementation,  $n$  sets of clustering parameters are used to generate  $n$  Label 2s. Mapping all Label 2s to Label 1 returns multiple annotations, and MACA ensembles these annotations by voting to generate the final cell-type prediction

MACA first computes cell-type scores for each cell, using a scoring method based on a marker database or user-defined marker lists. The scoring method uses the raw gene count to calculate a cell-type score for each cell, according to gene markers of this cell type. This results in converting a gene-expression matrix to cell-type score matrix. Then, MACA generates a label (Label 1) for each cell by identifying the cell type associated with the highest score. Independently, using the matrix of cell-type scores as input, the Louvain community detection algorithm (Blondel *et al.*, 2008) is applied to generate Label 2, which is a clustering label to which a cell belongs. Since the number of cell types is usually unknown, MACA tries clustering at greater resolution to over-cluster cells into many small but homogeneous groups.

Both Labels 1 and 2 serve as complimentary functions. Label 1 is assigned on a per-cell basis which may result in incorrectly annotating many cells due to noisiness in the maximum cell-type score for each cell. This may occur when the putative cell-type feature is covered up by ambient RNAs from dominant cell types (Pliner *et al.*, 2019). On the other hand, Label 2 is likely to suffer from a common problem in single-cell RNA-seq clustering analysis, where cells may share the same dominant features, even though they have been clustered into different groups because of subtle differences. Additionally, results from a clustering analysis can often vary since clustering is nondeterministic. Due to its dependence on user's decisions, mostly the choices of clustering resolution and neighborhood size.

To address these issues, MACA combines Labels 1 and 2 to get a comprehensive cell-type annotation by mapping Label 2 to Label 1 through a normalized confusion matrix. In the confusion matrix  $C$ ,  $c_{ij}$  represents the number of cells that were clustered as the  $i$ th cluster in Label 2 and labeled as the  $j$ th cell type in Label 1. The basic assumption of mapping Label 2 to Label 1 through a confusion matrix is that cells with the same clustering label (Label 2) should have the same cell-type label (Label 1). Ideally, if cells were identified to be in the same cluster, they should all share the same cell type, and this cell type has the highest score for cells in that cluster. However, in real data, this is rarely the case, as we argued above. Therefore, using a confusion matrix, we look for consensus between

Labels 1 and 2, by searching for the highest cell-type score in each cluster. Here, we compute the normalized confusion matrix  $C_n$  through dividing confusion matrix  $C$  by the size of the cluster:  $c_{i,j} = \frac{c_{i,j}}{\sum_{j=1}^N c_{i,j}}$ , and we search for column number with the largest value

for each row (Fig. 1b). If  $\max_j(c_{i,j}) \geq 0.5$ , the  $i$ th cluster would be assigned as the  $j$ th cell type, as  $>50\%$  of cells in the  $i$ th cluster are labeled as the  $j$ th cell type (Case 1). For cases where  $\max_j(c_{i,j}) < 0.5$ , it is likely that cell identities of some cells were covered up by ambient RNAs from dominant cell types (Case 2). Therefore, MACA records significant or at least the top-3 cell types for each cell in the  $i$ th cluster based on cell-type scores. To find significant cell types for each cell, we get a distribution of scores of all cell types for each cell and define those cell types as significant if their  $z$ -scores  $> 3$ . If the number of significant cell types is  $< 3$ , we would keep the top-3 cell types. Doing this can retrieve more potential cell-type labels for this cluster, and each cell will contribute at least three candidates into a pool of candidate cell types for this cluster. Then, MACA calculates frequency of each candidate cell type in this pool and assigns the  $i$ th cluster as the cell type with the highest frequency if the frequency exceeds half the size of the cluster ( $\max_j(f_{i,j}) \geq 0.5$ ) (Case 2a). Otherwise, the  $i$ th cluster would be labeled as 'unassigned' ( $\max_j(f_{i,j}) < 0.5$ ) (Case 2b), which is the case that cells in this cluster do not have an agreement on which cell types they belong to. For the choice of 0.5, we will show our examination in Section 3. As we mentioned before, clustering-based cell-type identification largely depends on user's choice, e.g. the choices of clustering resolution and neighborhood size. Therefore, the outcome may vary among different users. To have a more reproducible outcome, we cluster cells with different clustering parameters to get multiple clustering assignments (Label 2s). Repeating the procedure of mapping Labels 2 to 1 will enable us to get an ensemble annotation through voting, and this ensemble annotation is less influenced by a single clustering choice (Fig. 1c). Using ensemble approach also offers a naive way of scoring MACA-based cell-type predictions. Users can set up a threshold to filter cells whose annotations are less consistent in outcomes of different clustering trials, and we also provide examinations in the next section to help users choose a reasonable threshold for annotation with quality. In this study, we generated clusters using Louvain method with three different resolutions and three different numbers of neighborhood, which results in nine different clustering labels (Label 2s). After mapping these nine Label 2s to Label 1, we generated nine cell-type annotations. Then, we used a voting approach to get the final annotations (the highest votes from the nine annotations). Users can also increase the number of clustering trials to have a larger voting pool for annotation ensemble or decrease the number to save computation time.

Back to converting gene-expression matrix to cell-type score matrix, we collected four different scoring methods that were proposed to do the conversion. These scoring methods are either named by authors, or we named them after the last name of the first author. PlinerScore was a part of Garnett that was designed to annotate cell types through supervised classification (Pliner *et al.*, 2019). The uniqueness of PlinerScore is the use of TF-IDF transformation to deal with specificity of a gene marker and a cutoff to deal with issue of free mRNA in single-cell RNA-seq data. AUCell comes from SENIC, which uses gene sets to quantify regulon activities of single-cell expression data (Aibar *et al.*, 2017). In this study, AUCell quantifies the enrichment of every cell type as an area under the recovery curve (AUC) across the ranking of all gene markers in a particular cell. This assessment is cell-wise and is different from PlinerScore that requires transformation of the whole dataset. Both CIM and DingScore simply use the total expression of all gene markers of a particular cell type as the cell-type score (Ding *et al.*, 2020; Efroni *et al.*, 2015). CIM normalizes the total expression by multiplying a weight that is defined as the number of expressed gene markers divided by the number of all gene markers of this cell type. DingScore, on the other hand, normalizes the total expression of one cell type by dividing total expression of all genes. Since some cell types have a longer list of marker genes than others, cell types with more marker

genes in the database would have larger cell-type scores. Normalization in CIM was considered to address this issue. However, PlinerScore and DingScore were not intentionally designed to cope with unbalanced marker lists. To deal with this issue, we did a similar processing to normalization in CIM, which is dividing the score of each cell type by the number of expressed markers in that cell type. However, AUCell is a completely different approach from the other three scoring methods, which does not simply sum up values of marker genes for a given cell type. So, we ran AUCell without extra processing for returned values. Meanwhile, we show that the number of expressed marker genes in both PanglaoDB and CellMarker across six single-cell datasets tested in this study, and we found that most cell types in PanglaoDB have expressed marker genes within 0–60, while most cell types have <10 marker genes expressed in CellMarker (Supplementary Fig. S1). For both PanglaoDB and CellMarker, we can conclude that cell types with over 100 expressed marker genes are a minority.

In practice, we build MACA in the analysis pipeline of SCANPY, and MACA takes data in the format of ‘anndata’ in Python (Wolf et al., 2018). Expression data are preprocessed through cell and gene filtering, and transformed by LogNormlization method, the common practice in single-cell analysis. Then, the user provides marker information in the form of Python dictionary, and MACA transforms gene-expression matrix to cell-type score matrix. Next, annotation by MACA can be summarized into four steps as shown in Figure 1: (i) Louvain clustering to generate Label 2; (ii) generating Label 1 via max function; (iii) mapping Label 2 to Label 1 through normalized confusion matrix and (iv) repeating steps 1–3 to have ensembled annotation.

### 3 Results

The key component for optimal performance of MACA is constructing cell-type scores from the gene-expression matrix. We investigated four scoring methods that have been proposed to transform gene-expression matrix to cell-type score matrix (Aibar et al., 2017; Ding et al., 2020; Efroni et al., 2015; Pliner et al., 2019), and we tested these methods with two public marker databases (Franzén et al., 2019; Zhang et al., 2019b) in six single-cell studies that comprised 3000–20 000 cells (Baron et al., 2016; Cui et al., 2019; Tian et al., 2019; Vieira Braga et al., 2019; Wang et al., 2020; Zheng et al., 2017), which include three benchmark datasets (Supplementary Table S1; Abdelaal et al., 2019). To evaluate these annotation outcomes, we used Adjusted Rand Index (ARI) and Normalized Mutual Information (NMI). Both ARI and NMI are calculated by measuring similarity or agreement between our annotations and authors’ annotations. For the three benchmark datasets, authors’ annotations would be the ground-truth label, while authors’ annotations in the other three datasets are at least created under careful investigation. Therefore, use of ARI and NMI, in this case, is to show how well we can reproduce authors’ outcomes. We found annotations using PlinerScore with markers in PanglaoDB have the largest agreement with authors’ annotations for all six datasets, in terms of both ARI and NMI (Table 1). Therefore, MACA uses PanglaoDB with PlinerScore as the main marker database and scoring method, respectively. When we define if Label 2 agrees with Label 1, we selected 0.5 as the threshold. It is out of a simple reasoning of whether the half agrees. However, it is possible to set up a less or more stringent threshold to define the consensus between Labels 1 and 2. Thus, we further tested how different thresholds will affect MACA’s performance. We changed the threshold from 0.2 to 0.9 and performed our test in these six datasets. We expect annotations would vary, but surprisingly, MACA’s performance is quite robust to the choice of this parameter, except that we observed drops of ARI and NMI in two datasets when using 0.9 as threshold (Supplementary Table S2).

Next, we seek to compare MACA with other existing marker-based annotation tools. CellAssign and SCINA are two computational methods that have been proposed for automatic cell-type assignment (Zhang et al., 2019a, 2019c). Both methods rely on statistical interference to compute the probabilities of cell types, which

are time- and computation-intensive. Recently, Cell-ID was released for extraction of gene signature as well as cell-type annotation (Cortal et al., 2021). We also noticed scCATCH and SCSA, which are both cluster-based annotation tools (Cao et al., 2020; Shao et al., 2020). Both scCATCH and SCSA require identifying differential marker genes for each cluster via a statistical test implemented in Seurat and then matching identified cluster markers to marker database (Butler et al., 2018). Here, we compared MACA with CellAssign, SCINA, Cell-ID and scCATCH using these six single-cell studies and cell markers in PanglaoDB. We tested MACA, CellAssign, SCINA, Cell-ID and scCATCH on a workstation with 16-core CPU and 64 GB memory. MACA can finish annotation within 1 min (cells around 3000) and <2 min for a relatively large dataset (cells up to 20 000 cells). On the datasets used and on our computational resources, scCATCH and Cell-ID took longer than MACA to compute annotations and ranks as the second and the third fastest. In our hands, SCINA took around 20-min time to finish annotation for a large dataset, and CellAssign took the longest time to complete cell-type assignment and failed to annotate data with more than 20 000 cells due to lack of memory (Supplementary Table S3). Because annotation by scCATCH needs clustering first and differential marker identification is highly affected by clustering outcome, the investigator will need to do a thorough investigation to make sure that clustering is not overdone or underestimated. In this study, we reported the highest and the averaged outcomes of scCATCH in each dataset. Comparing these results with manual annotations from the authors, we found (i) MACA labels cells had a higher consensus than CellAssign, SCINA, Cell-ID and scCATCH, in terms of both ARI and NMI and (ii) MACA and scCATCH identify similar numbers of cell types to author’s annotations, while the other three methods, especially Cell-ID, report overall more different cell types (Table 1). The low ARIs and NMIs of CellAssign and Cell-ID can be counted as results of (i) many ‘unassigned’ cells and (ii) exceeding numbers of different cell types over the numbers reported by authors. It is important to note that other methods compared here were run on their default parameters. In future, parameter tuning of those methods on a computer with higher memory should be carried out for a comprehensive benchmarking on many datasets. Finally, to better evaluate annotations, we used a machine-learning approach to assess cell-type assignment. Training classifiers was recently proposed by Miao et al. (2020) to assist in finding a good clustering resolution, and we adopt this idea to evaluate our annotations. Basically, if the annotation is good enough, we can train a classifier to predict cell type using gene-expression values with high accuracy. Conversely, if there are many wrong labels, it would be hard for a classifier to make the right decision. We performed 5-fold cross-validated training, where we split one dataset into 4-fold training set and 1-fold testing set and trained an SVM classifier on the training sets and applied the classifier to predict labels for the testing set. This procedure repeats five times to get a mean accuracy. Instead of treating authors’ annotations as ground truth, this machine-learning evaluation provides an independent angle to judge annotation quality. Indeed, MACA achieves high concordance with authors’ reported annotations and higher mean of accuracies than other methods (Supplementary Table S4). Of note, high accuracy of SVM classifier is not equal to correctness of annotation. Meanwhile, ARI and NMI report similarity between two annotations but cannot reflect the difference of annotation resolution. For example, MACA may return less cell types than authors. Moreover, annotation resolution of MACA highly depends on the number of cell types in the marker database, and it is likely that MACA cannot annotate some rare subtypes that do not show up in the marker database. Here, we used confusion matrix to show how cell-type labels by MACA are against cell-type labels by authors (Supplementary Fig. S2). Take annotation of human pancreas as an example, cells annotated by MACA as ‘Pancreatic stellate cells’ fall into three groups that were annotated by author as ‘activated stellate cells’, ‘quiescent stellate cells’ and ‘Schwann cells’, respectively. Since MACA may have a different annotation resolution from the authors, we performed a test to show how different annotation resolutions can affect calculations of ARI and NMI. We included the

**Table 1.** Performance of MACA, CellAssign, SCINA, Cell-ID and scCATACH in six scRNA-seq datasets, measured by ARI and NMI

| Method                   | PBMC (Zheng <i>et al.</i> , 2017) | CellBench (Tian <i>et al.</i> , 2019) | Pancreas (Baron <i>et al.</i> , 2016) | Heart (Wang <i>et al.</i> , 2020) | Heart (Cui <i>et al.</i> , 2019) | Lung (Vieira Braga <i>et al.</i> , 2019) |
|--------------------------|-----------------------------------|---------------------------------------|---------------------------------------|-----------------------------------|----------------------------------|------------------------------------------|
| ARI                      |                                   |                                       |                                       |                                   |                                  |                                          |
| PanglaoDB + PlinerScore  | 0.95                              | 0.92                                  | 0.9                                   | 0.71                              | 0.61                             | 0.45                                     |
| PanglaoDB + AUCell       | 0.04                              | 0                                     | 0.78                                  | 0.39                              | 0.47                             | 0.29                                     |
| PanglaoDB + CIM          | 0.28                              | 0.65                                  | 0.9                                   | 0.27                              | 0.3                              | 0.33                                     |
| PanglaoDB + DingScore    | 0.83                              | 0.74                                  | 0.69                                  | 0.07                              | 0.44                             | 0.2                                      |
| CellMarker + PlinerScore | 0.38                              | 0.43                                  | 0.27                                  | 0.57                              | 0.13                             | 0.21                                     |
| CellMarker + AUCell      | 0.29                              | 0.52                                  | 0.32                                  | 0.34                              | 0.09                             | 0.14                                     |
| CellMarker + CIM         | 0.24                              | 0.6                                   | 0.54                                  | 0.56                              | 0.07                             | 0.09                                     |
| CellMarker + DingScore   | 0.22                              | 0.55                                  | 0.38                                  | 0.37                              | 0.19                             | NA                                       |
| SCINA                    | 0.46                              | 0.63                                  | 0.89                                  | 0.13                              | 0.55                             | 0.31                                     |
| CellAssign               | NA                                | 0                                     | 0.89                                  | 0.15                              | 0.53                             | 0.26                                     |
| Cell-ID                  | 0.5                               | 0.17                                  | 0.57                                  | 0.1                               | 0.49                             | 0.35                                     |
| scCATACH (best)          | 0.62                              | 0.56                                  | 0.86                                  | 0.04                              | 0.14                             | 0.6                                      |
| scCATACH (average)       | 0.57                              | 0.4                                   | 0.66                                  | 0.04                              | 0.05                             | 0.35                                     |
| NMI                      |                                   |                                       |                                       |                                   |                                  |                                          |
| PanglaoDB + PlinerScore  | 0.89                              | 0.92                                  | 0.88                                  | 0.59                              | 0.62                             | 0.59                                     |
| PanglaoDB + AUCell       | 0.09                              | 0                                     | 0.79                                  | 0.41                              | 0.5                              | 0.31                                     |
| PanglaoDB + CIM          | 0.51                              | 0.8                                   | 0.88                                  | 0.3                               | 0.44                             | 0.4                                      |
| PanglaoDB + DingScore    | 0.74                              | 0.85                                  | 0.7                                   | 0.1                               | 0.47                             | 0.33                                     |
| CellMarker + PlinerScore | 0.44                              | 0.64                                  | 0.57                                  | 0.51                              | 0.32                             | 0.42                                     |
| CellMarker + AUCell      | 0.23                              | 0.67                                  | 0.46                                  | 0.32                              | 0.33                             | 0.17                                     |
| CellMarker + CIM         | 0.49                              | 0.78                                  | 0.73                                  | 0.41                              | 0.31                             | 0.21                                     |
| CellMarker + DingScore   | 0.43                              | 0.73                                  | 0.6                                   | 0.34                              | 0.33                             | 0.08                                     |
| SCINA                    | 0.54                              | 0.71                                  | 0.84                                  | 0.07                              | 0.54                             | 0.46                                     |
| CellAssign               | NA                                | 0.06                                  | 0.86                                  | 0.08                              | 0.51                             | 0.49                                     |
| Cell-ID                  | 0.67                              | 0.38                                  | 0.74                                  | 0.08                              | 0.55                             | 0.58                                     |
| scCATACH (best)          | 0.77                              | 0.7                                   | 0.84                                  | 0.05                              | 0.3                              | 0.73                                     |
| scCATACH (average)       | 0.75                              | 0.62                                  | 0.75                                  | 0.04                              | 0.12                             | 0.63                                     |
| No. of cell types        |                                   |                                       |                                       |                                   |                                  |                                          |
| MACA                     | 8                                 | 6                                     | 11                                    | 8                                 | 7                                | 13                                       |
| SCINA                    | 14                                | 14                                    | 17                                    | 16                                | 23                               | 41                                       |
| CellAssign               | NA                                | 9                                     | 17                                    | 18                                | 24                               | 31                                       |
| Cell-ID                  | 33                                | 55                                    | 48                                    | 35                                | 37                               | 63                                       |
| scCATACH (best)          | 9                                 | 5                                     | 10                                    | 3                                 | 3                                | 16                                       |
| Author's annotation      | 5                                 | 5                                     | 14                                    | 5                                 | 9                                | 13                                       |

Note: Eight different settings of MACA include using four cell-type scoring methods (PlinerScore, AUCell, CIM and DingScore) with two marker databases (PanglaoDB and CellMarker).

human kidney (CD10–) data, which has three different annotation resolutions by the authors, from 5 major cell types to 29 intermediate cell types, and to 50 fine cell types (Kuppe *et al.*, 2021). We used MACA to annotate this data and compared MACA’s annotation with these three annotations. We found NMI is more robust to change of annotation resolution than ARI. It also suggests that a higher ARI reflects similar resolution between MACA and author (Supplementary Fig. S3).

As we mentioned above, using ensemble approach also offers user an option to filter cells whose annotations are less consistent in outcomes of different clustering trials. However, it also causes loss of cells for downstream analysis, like cellular composition analysis. To find a good balance between having higher annotation quality and keeping most cells for downstream analysis, we tested threshold of voting from 1/9 to 9/9, where the numerator means the minimum number of votes required to keep the cell-annotation. With 1/9, all cells will be kept, with 2/9, cells with annotations of at least two votes will be kept, while only cells that have the same annotation across nine clustering trials will be considered if threshold is set up as 9/9. We reported the results across 10 datasets in Supplementary Table S5, and it may provide a reference for user to choose a threshold that serves user’s need. Of note, we kept all cells in other evaluations. Particularly, all cells were used in benchmark with other methods. Here, we suggest setting up the threshold as 7/9. Next, we

expect to show that annotation by MACA is applicable for most single-cell RNA-seq platforms. We re-annotated PBMC data from a new study by Ding *et al.* (2020). These data consist of two biological samples from nine platforms. We found that (i) both PBMC samples have the same major cell types, and these nine platforms can successfully profile them (Supplementary Fig. S4a) and (ii) annotation by MACA shows that all platforms profile similar cellular components for these two PBMC samples, except CEL-Seq2 (Supplementary Fig. S4b). These results are largely consistent to the original report (Ding *et al.*, 2020). However, this PBMC data did not come with a ground-truth annotation, we further added the human pancreas data, which consist of five independent studies profiled by four different single-cell RNA-seq platforms (Baron *et al.*, 2016; Grün *et al.*, 2016; Lawlor *et al.*, 2017; Muraro *et al.*, 2016; Segerstolpe *et al.*, 2016). Annotation by MACA has 0.929 ARI and 0.908 NMI against author-reported annotation, and we also observed that all major cell types were revealed across all four platforms (Supplementary Fig. S4c).

Finally, we applied MACA to a single-nuclei RNA-seq dataset from all four chambers of the human heart, comprising ~290K nuclei (Tucker *et al.*, 2020). MACA could annotate each of the four chambers comprising ~80K cells each in <6min. Annotations by MACA have major agreement with author’s reported annotations with an average ARI and NMI of 0.63 and 0.76, respectively



(Supplementary Table S6). However, we also found some disagreements exist in annotation of cells from left and right atria. Therefore, we investigated disagreement between MACA's and author's annotations, and found the biggest difference stems from disagreement in assignments for neuronal cells and lymphocytes, which are both small-population cell types in this dataset (1702 neuronal cells and 1503 lymphocytes out of ~290K). We found neuronal cells were not revealed and author-reported lymphocytes were reported as memory T cells in MACA's annotation (Supplementary Table S7a and b).

By default, MACA works with the list marker genes and cell types present in PanglaoDB, but users can also input their own gene-lists. A major limitation of MACA is that it can only annotate cell types that are predefined in the marker reference, but with more marker gene sets becoming available with single-cell sequencing studies, we believe that MACA will be useful to annotate heterogeneous single-cell datasets. This points us two future directions to improve MACA. First, with more atlas studies that profile all sorts of biological systems, more refined markers for small cell populations can be defined, and MACA could reach finer annotation resolution by integrating markers from these new atlas studies. Second, weights of markers should be incorporated into the scoring method of MACA, e.g. marker specificity and expression strength. However, at the current stage, all markers have equal weights when they contribute to cell-type scores, and we believe that incorporating marker weights will be beneficial for accurate annotation. With a more refined marker database and cell-type scoring method, MACA would rapidly perform integrated annotation across multiple datasets, and this is very critical for downstream analyses like cellular component analysis across datasets under different conditions. In fact, we noticed that combining PlinerScore and PanglaoDB to generate new features has the advantages of correcting batch effects for integrated annotation across datasets, and we aim to extend the use of MACA to standardization of cell-type annotation across datasets in the future (see application in integrated annotation on GitHub of MACA). Finally, we conclude that MACA is a suitable tool for automatic cell-type annotation that can aid both experts and nonexperts in rapid annotation of their single-cell datasets.

## Disclosures

Simon Baumgart, Christian Stegmann and Sikander Hayat are employees of Bayer US LLC (a subsidiary of Bayer AG) and may own stock in Bayer AG.

## Acknowledgements

We would like to thank Mark Chaffin, Stephen Fleming and other members of the Precision Cardiology Lab for providing useful feedback on the manuscript.

**Financial Support:** Funding for this study was provided by Bayer US LLC.

## Data availability

All data used in this study are public and can be found through their associated publications.

**Conflict of Interest:** The authors are paid employees of Bayer US LLC and declare no potential conflicts of interest.

## References

- Abdelal, T. *et al.* (2019) A comparison of automatic cell identification methods for single-cell RNA sequencing data. *Genome Biol.*, **20**, 194–194.
- Aibar, S. *et al.* (2017) SCENIC: single-cell regulatory network inference and clustering. *Nat. Methods*, **14**, 1083–1086.
- Baron, M. *et al.* (2016) A single-cell transcriptomic map of the human and mouse pancreas reveals inter- and intra-cell population structure. *Cell Syst.*, **3**, 346–360.e344.
- Blondel, V.D. *et al.* (2008) Fast unfolding of communities in large networks. *J. Stat. Mech.*, **2008**, P10008–P10012.
- Butler, A. *et al.* (2018) Integrating single-cell transcriptomic data across different conditions, technologies, and species. *Nat. Biotechnol.*, **36**, 411–420.
- Cao, Y. *et al.* (2020) SCSA: a cell type annotation tool for single-cell RNA-seq data. *Front. Genet.*, **11**, 490–490.
- Cortal, A. *et al.* (2021) Gene signature extraction and cell identity recognition at the single-cell level with Cell-ID. *Nat. Biotechnol.*, **39**, 1095–1102.
- Cui, Y. *et al.* (2019) Single-cell transcriptome analysis maps the developmental track of the human heart. *Cell Rep.*, **26**, 1934–1950.e1935.
- Ding, J. *et al.* (2020) Systematic comparison of single-cell and single-nucleus RNA-sequencing methods. *Nat. Biotechnol.*, **38**, 737–746.
- Efroni, I. *et al.* (2015) Quantification of cell identity from single-cell gene expression profiles. *Genome Biol.*, **16**, 9–9.
- Franzén, O. *et al.* (2019) PanglaoDB: a web server for exploration of mouse and human single-cell RNA sequencing data. *Database*, **2019**, baz046.
- Grün, D. *et al.* (2016) De novo prediction of stem cell identity using single-cell transcriptome data. *Cell Stem Cell*, **19**, 266–277.
- Kuppe, C. *et al.* (2021) Decoding myofibroblast origins in human kidney fibrosis. *Nature*, **589**, 281–286.
- Lähnemann, D. *et al.* (2020) Eleven grand challenges in single-cell data science. *Genome Biol.*, **21**, 31–35.
- Lawlor, N. *et al.* (2017) Single-cell transcriptomes identify human islet cell signatures and reveal cell-type-specific expression changes in type 2 diabetes. *Genome Res.*, **27**, 208–222.
- Mancarci, B.O. *et al.* (2017) Cross-laboratory analysis of brain cell type transcriptomes with applications to interpretation of bulk tissue data. *eNeuro*, **4**, ENEURO.0212-17.2017.
- Miao, Z. *et al.* (2020) Putative cell type discovery from single-cell gene expression data. *Nat. Methods*, **17**, 621–628.
- Muraro, M.J. *et al.* (2016) A single-cell transcriptome atlas of the human pancreas. *Cell Syst.*, **3**, 385–394.e383.
- Pliner, H.A. *et al.* (2019) Supervised classification enables rapid annotation of cell atlases. *Nat. Methods*, **16**, 983–986.
- Segerstolpe, Å. *et al.* (2016) Single-cell transcriptome profiling of human pancreatic islets in health and type 2 diabetes. *Cell Metab.*, **24**, 593–607.
- Shao, X. *et al.* (2020) scCATCH: automatic annotation on cell types of clusters from single-cell RNA sequencing data. *iScience*, **23**, 100882.
- Tian, L. *et al.* (2019) Benchmarking single cell RNA-sequencing analysis pipelines using mixture control experiments. *Nat. Methods*, **16**, 479–487.
- Tucker, N.R. *et al.* (2020) Transcriptional and cellular diversity of the human heart. *Circulation*, **142**, 466–482.
- Vieira Braga, F.A. *et al.* (2019) A cellular census of human lungs identifies novel cell states in health and in asthma. *Nat. Med.*, **25**, 1153–1163.
- Wang, L. *et al.* (2020) Single-cell reconstruction of the adult human heart during heart failure and recovery reveals the cellular landscape underlying cardiac function. *Nat. Cell Biol.*, **22**, 108–119.
- Wolf, F.A. *et al.* (2018) SCANPY: large-scale single-cell gene expression data analysis. *Genome Biol.*, **19**, 15–15.
- Zhang, A.W. *et al.* (2019a) Probabilistic cell-type assignment of single-cell RNA-seq for tumor microenvironment profiling. *Nat. Methods*, **16**, 1007–1015.
- Zhang, X. *et al.* (2019b) CellMarker: a manually curated resource of cell markers in human and mouse. *Nucleic Acids Res.*, **47**, D721–D728.
- Zhang, Z. *et al.* (2019c) SCINA: a semi-supervised subtyping algorithm of single cells and bulk samples. *Genes*, **10**, 531.
- Zheng, G.X.Y. *et al.* (2017) Massively parallel digital transcriptional profiling of single cells. *Nat. Commun.*, **8**, 14049–14049.
